# Supplementary material for: 2-(4-Bromobenzyl) tethered 4-amino aryl/alkyl-5,6,7,8-tetrahydrobenzo[4,5]thieno[2,3- d ]pyrimidines: design, synthesis, anticancer assessment via dual topoisomerase-I/II inhibition, and in silico studies
Source: Royal Society of Chemistry journal article supplement (doi:10.1039/d4md00817k), 2024-12-17
Supplement: d4md00817k1.pdf [file d4md00817k1.pdf]

## **2-(4-Bromobenzyl) tethered 4-amino aryl/alkyl-5,6,7,8-tetrahydrobenzo[4,5]thieno[2,3-*d*]pyrimidines: Design, Synthesis, anticancer assessment via dual topoisomerase-1/II inhibition, and *in silico* studies**

Sahil Arora,<sup>a</sup> Bhagyshree Patra,<sup>b</sup> Isha Dhamija,<sup>b</sup> Santosh Guru,<sup>b</sup> Raj Kumar <sup>a\*</sup>

<sup>a</sup>Laboratory for Drug Design and Synthesis, Department of Pharmaceutical Sciences and Natural Products, School of Pharmaceutical Sciences, Central University of Punjab, Bathinda 151 401 India.

<sup>b</sup>Department of Biological Sciences, National Institute of Pharmaceutical Education and Research, Hyderabad, India

\*Corresponding author: Raj Kumar (raj.khunger@cup.edu.in; raj.khunger@gmail.com )

| S.No. | Contents                                                                                                                  | Page No. |
|-------|---------------------------------------------------------------------------------------------------------------------------|----------|
| 1.    | <sup>1</sup> H, <sup>13</sup> C NMR and HRMS spectra's of representative compounds                                        | S2-S8    |
| 2.    | Assessment of cytotoxicity of active compounds 7a and 7r against HEK-293 cells at 10 and 25 μM concentration respectively | S9       |

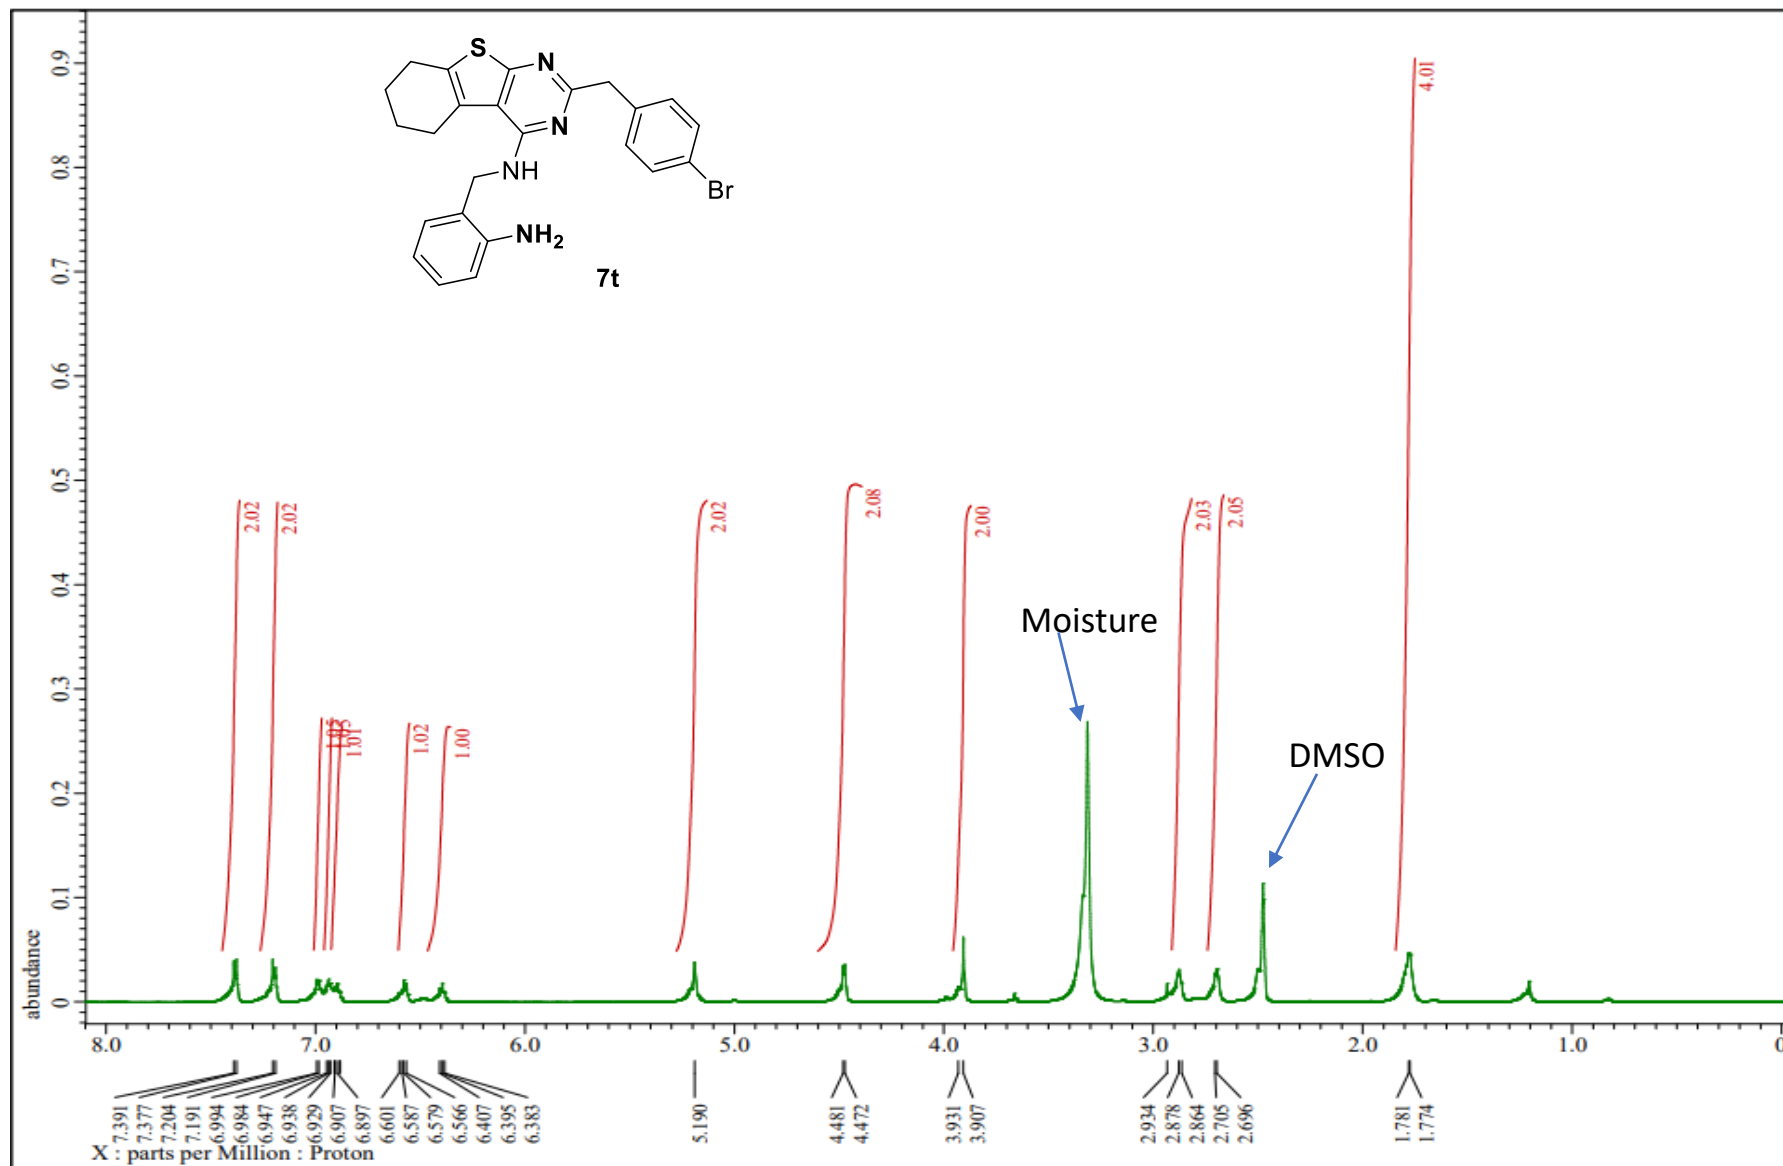

**Figure S1** <sup>1</sup>H NMR (d<sub>6</sub>-DMSO, 600 MHz) of *N*-(2-aminobenzyl)-2-(4-bromobenzyl)-5,6,7,8-tetrahydrobenzo[4,5]thieno[2,3-*d*]pyrimidin-4-amine (**7t**)

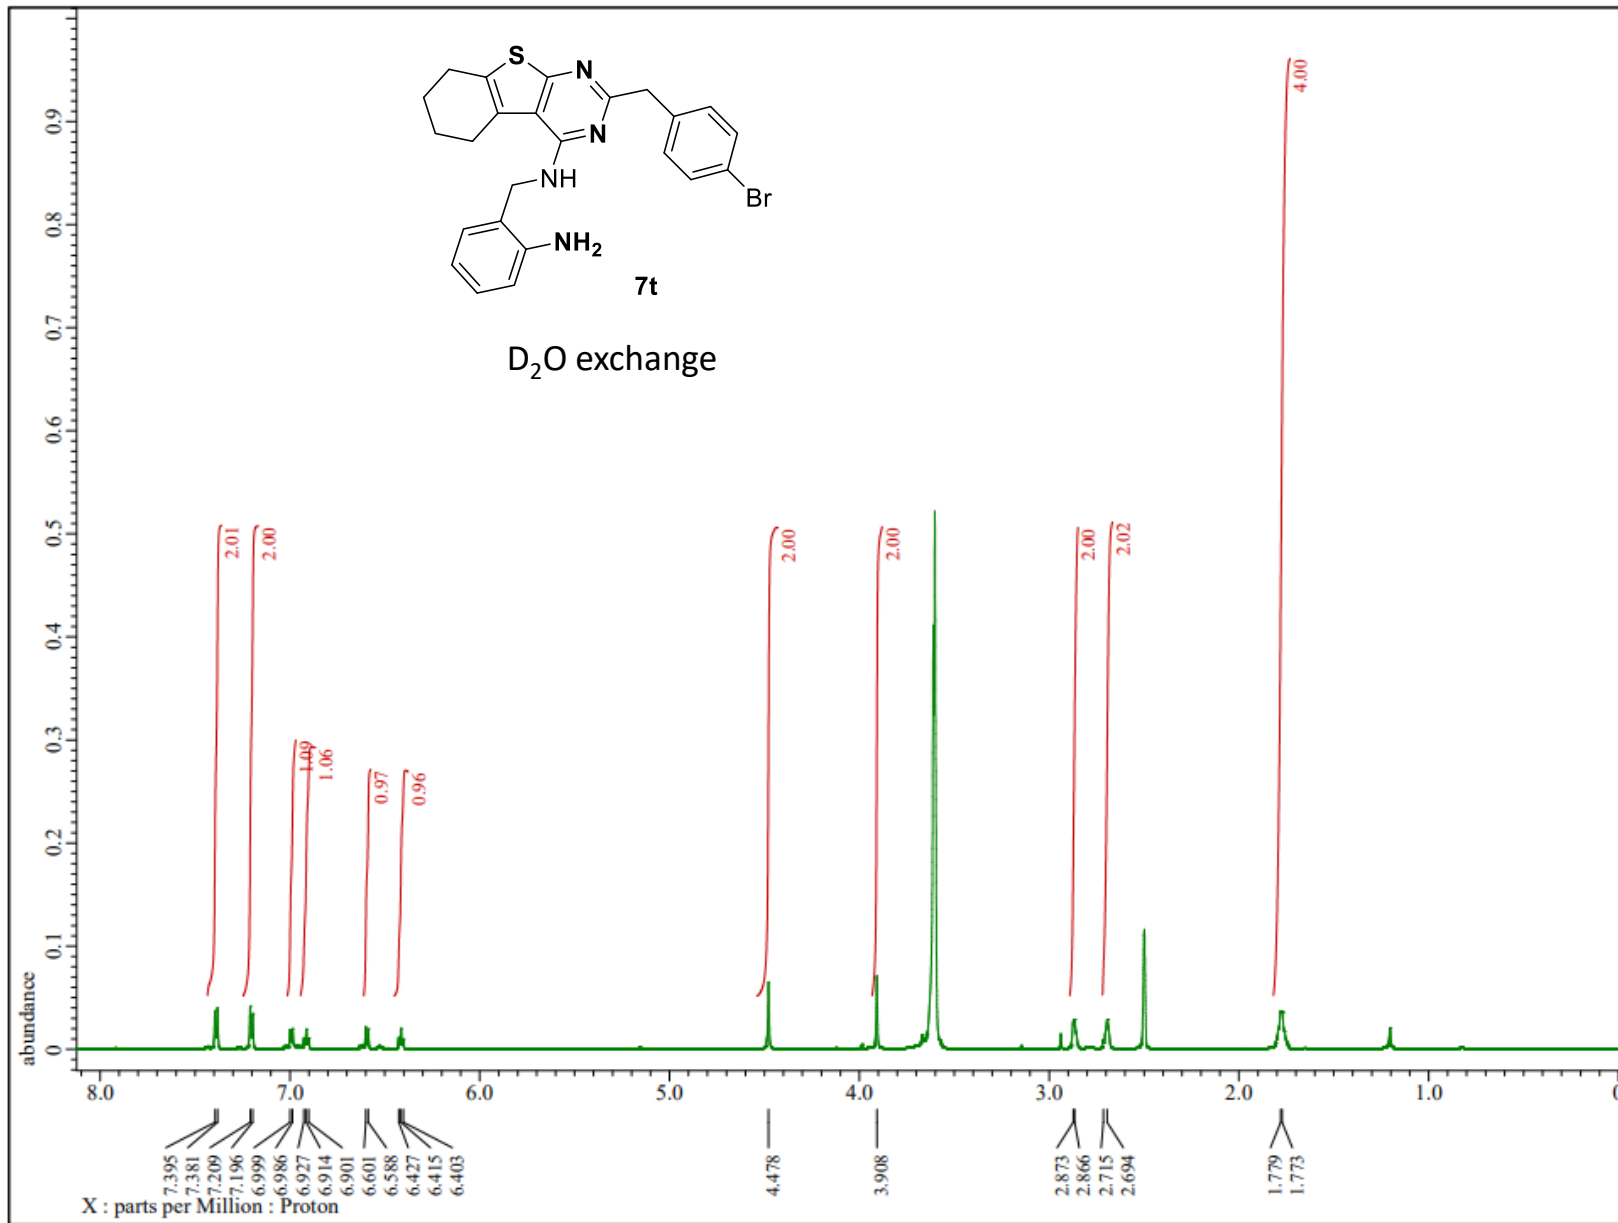

**Figure S2** <sup>1</sup>H NMR (d<sub>6</sub>-DMSO, 600 MHz) of *N*-(2-aminobenzyl)-2-(4-bromobenzyl)-5,6,7,8-tetrahydrobenzo[4,5]thieno[2,3-*d*]pyrimidin-4-amine (**7t**)

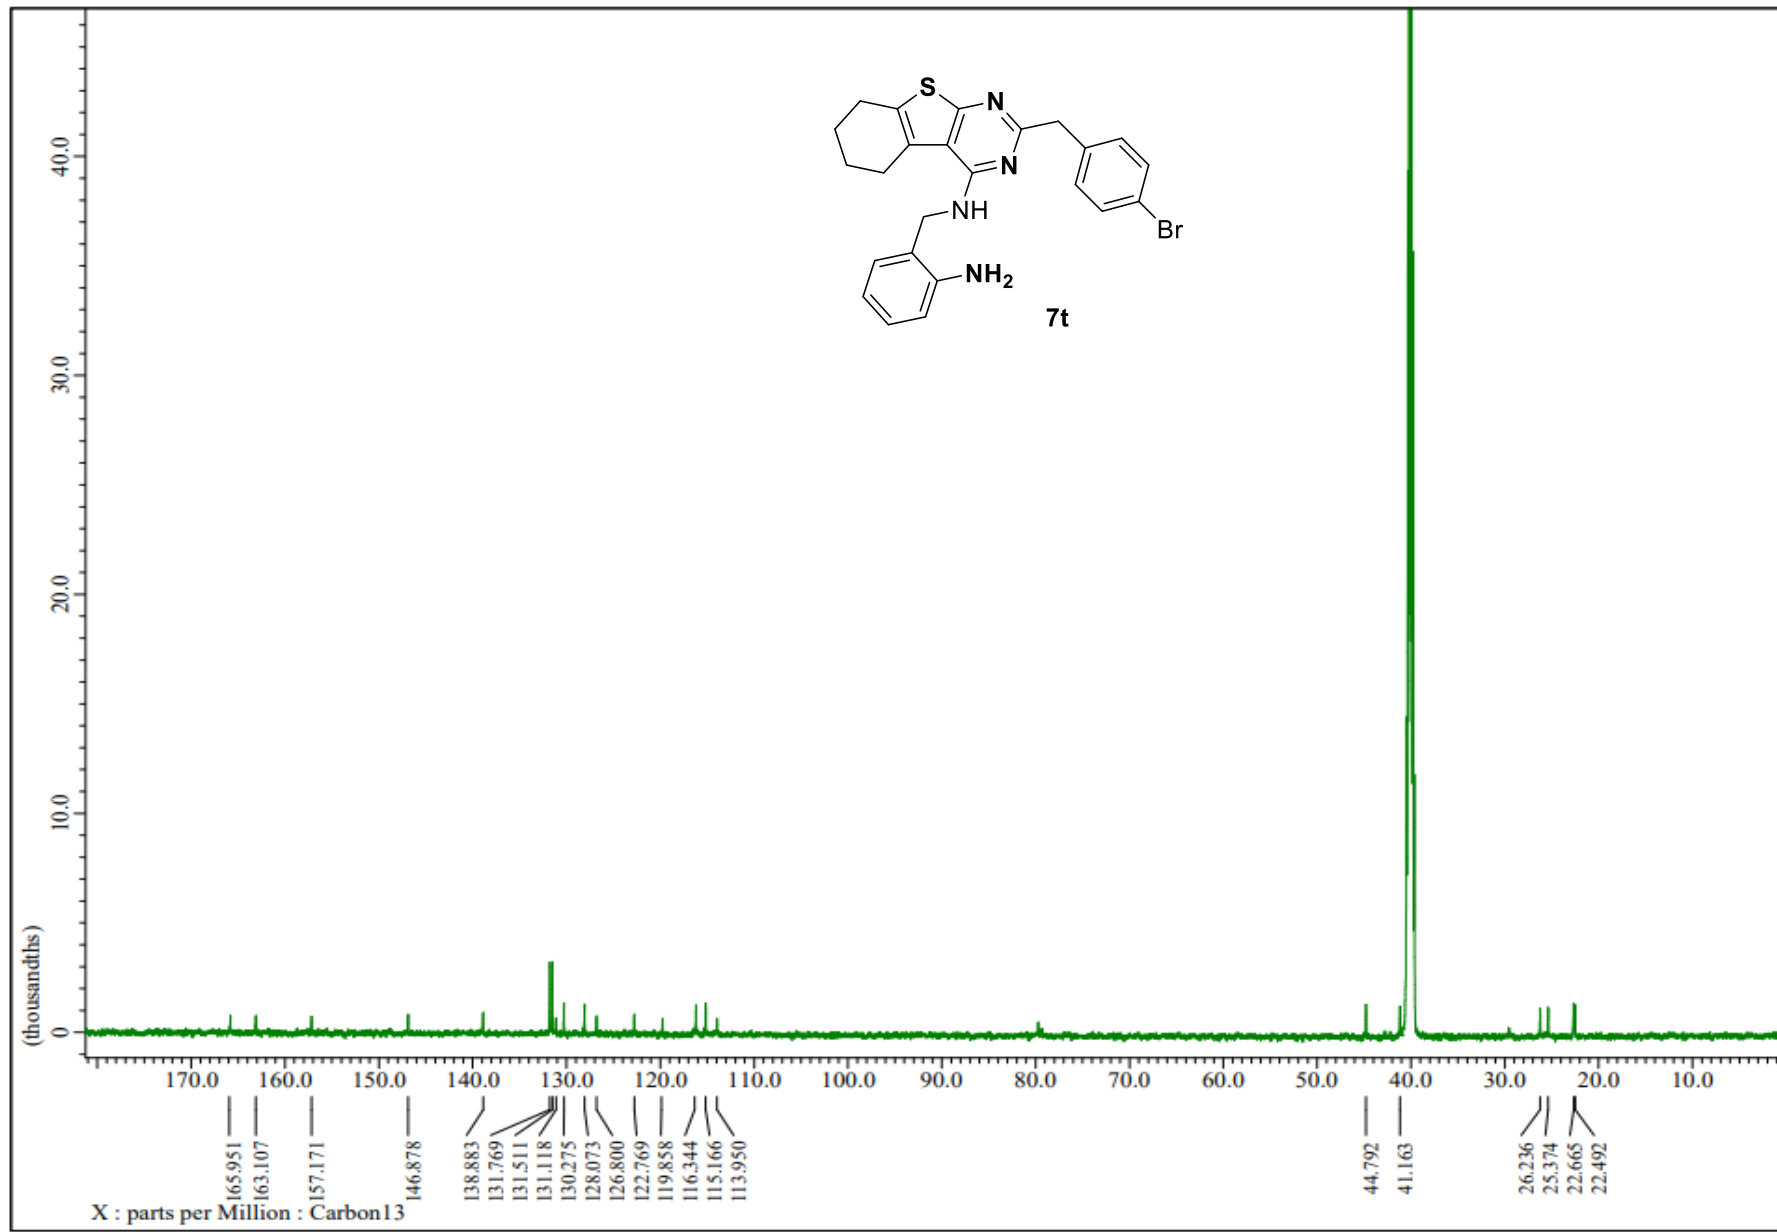

**Figure S3** <sup>13</sup>C NMR (d<sub>6</sub>-DMSO, 151 MHz) of *N*-(2-aminobenzyl)-2-(4-bromobenzyl)-5,6,7,8-tetrahydrobenzo[4,5]thieno[2,3-*d*]pyrimidin-4-amine (**7t**)

# Spectrum Plot Report

|                |                      |              |                        |            |                 |                   |                                 |
|----------------|----------------------|--------------|------------------------|------------|-----------------|-------------------|---------------------------------|
| Name           |                      | Rack Pos.    |                        | Instrument | DESKTOP-7TLK19J | Operator          | SYSTEM (SYSTEM)                 |
| Inj. Vol. (ul) | 10                   | Plate Pos.   |                        | IRM Status | Success         |                   |                                 |
| Data File      | 29052024_AS-26_006.d | Method (Acq) | vinod231023 low mass.m | Comment    |                 | Acq. Time (Local) | 29-05-2024 18:10:34 (UTC+05:30) |

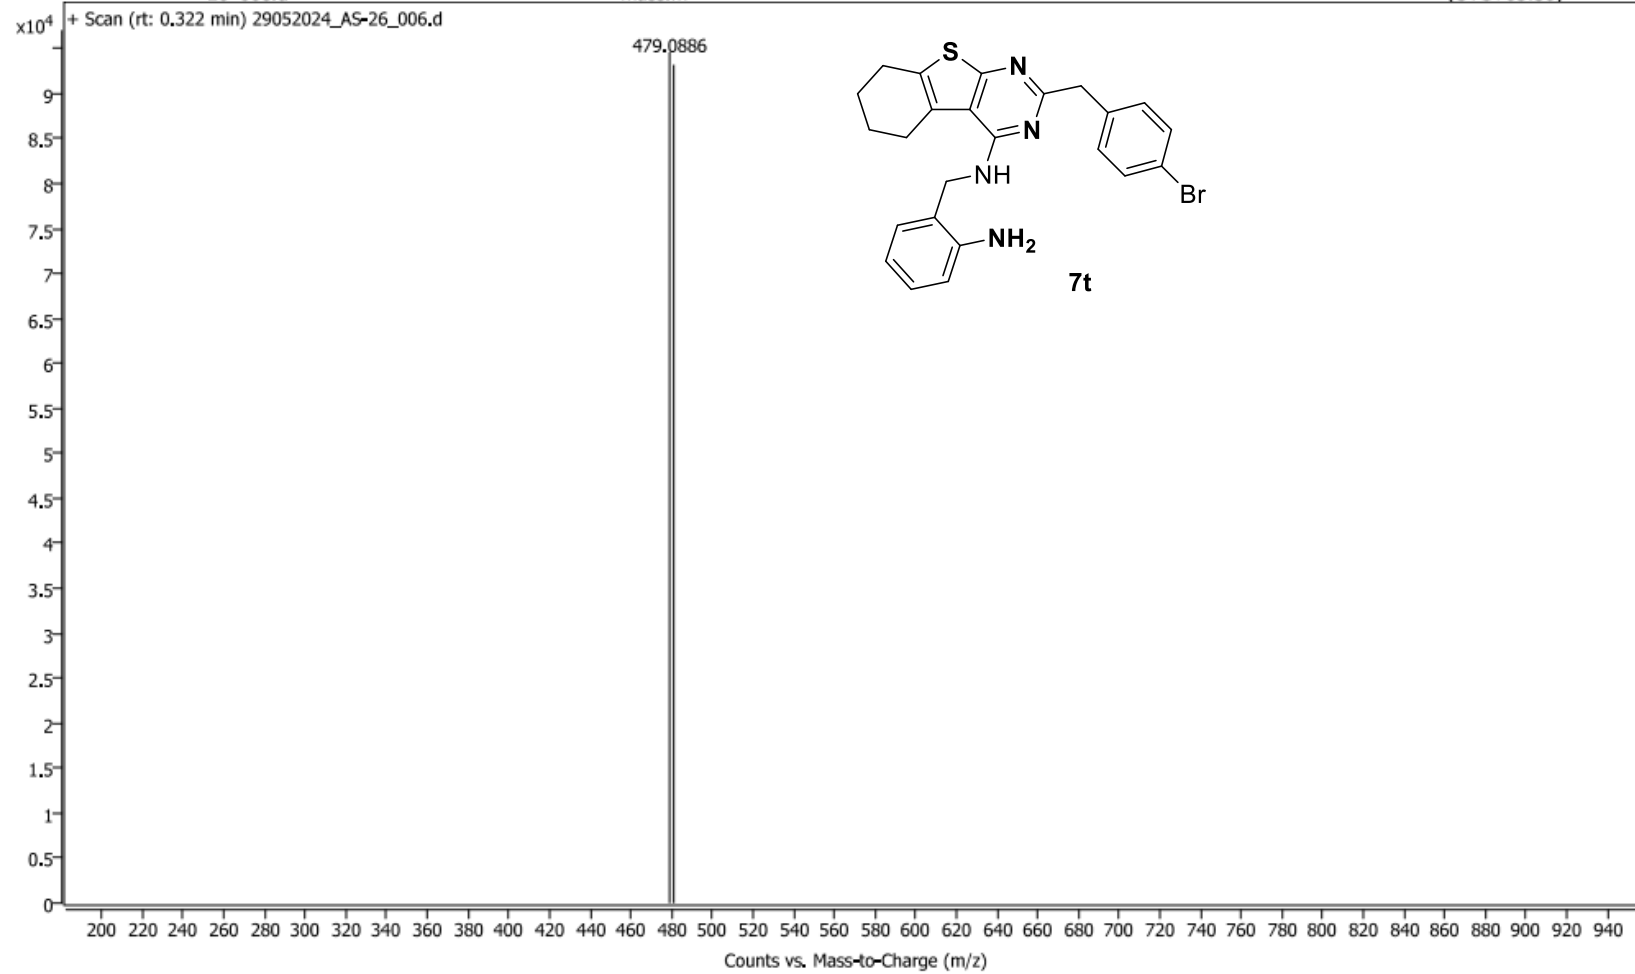

**Figure S4** HRMS (ESI-TOF) of *N*-(2-aminobenzyl)-2-(4-bromobenzyl)-5,6,7,8-tetrahydrobenzo[4,5]thieno[2,3-*d*]pyrimidin-4-amine (**7t**)

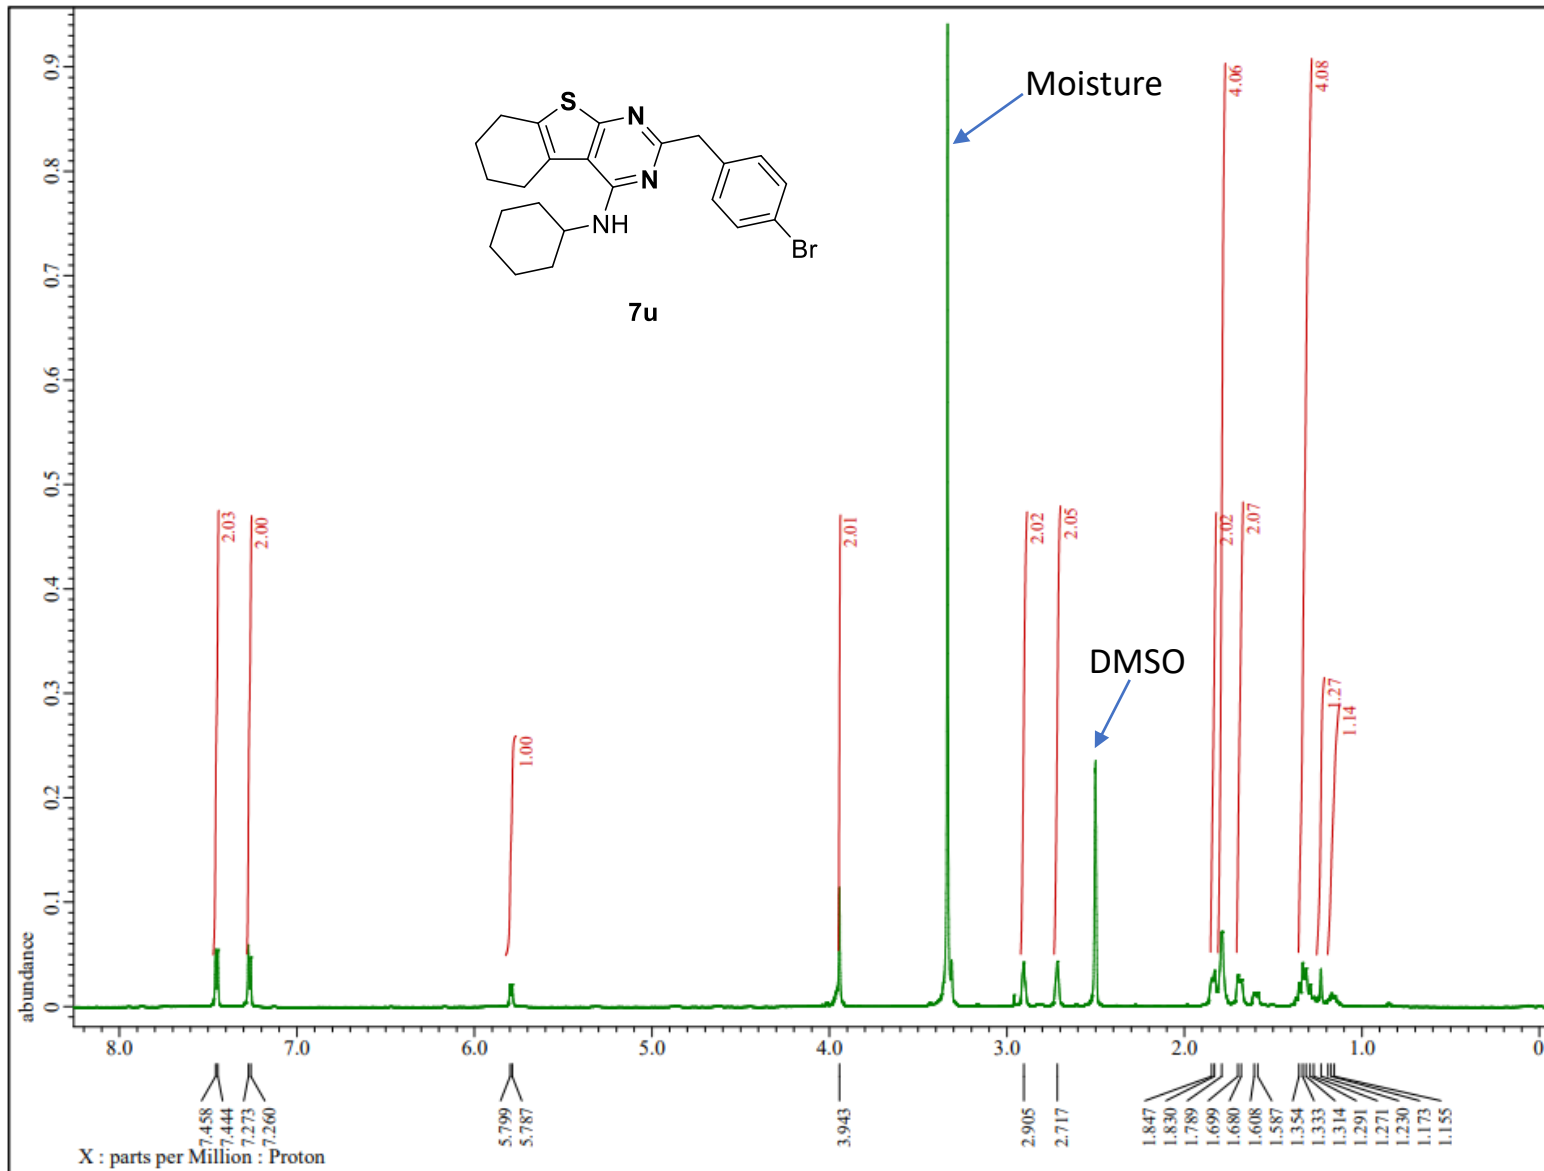

**Figure S5**  $^1\text{H}$  NMR ( $d_6$ -DMSO, 600 MHz) of 2-(4-bromobenzyl)-*N*-cyclohexyl-5,6,7,8-tetrahydrobenzo[4,5]thieno[2,3-*d*]pyrimidin-4-amine (**7u**)

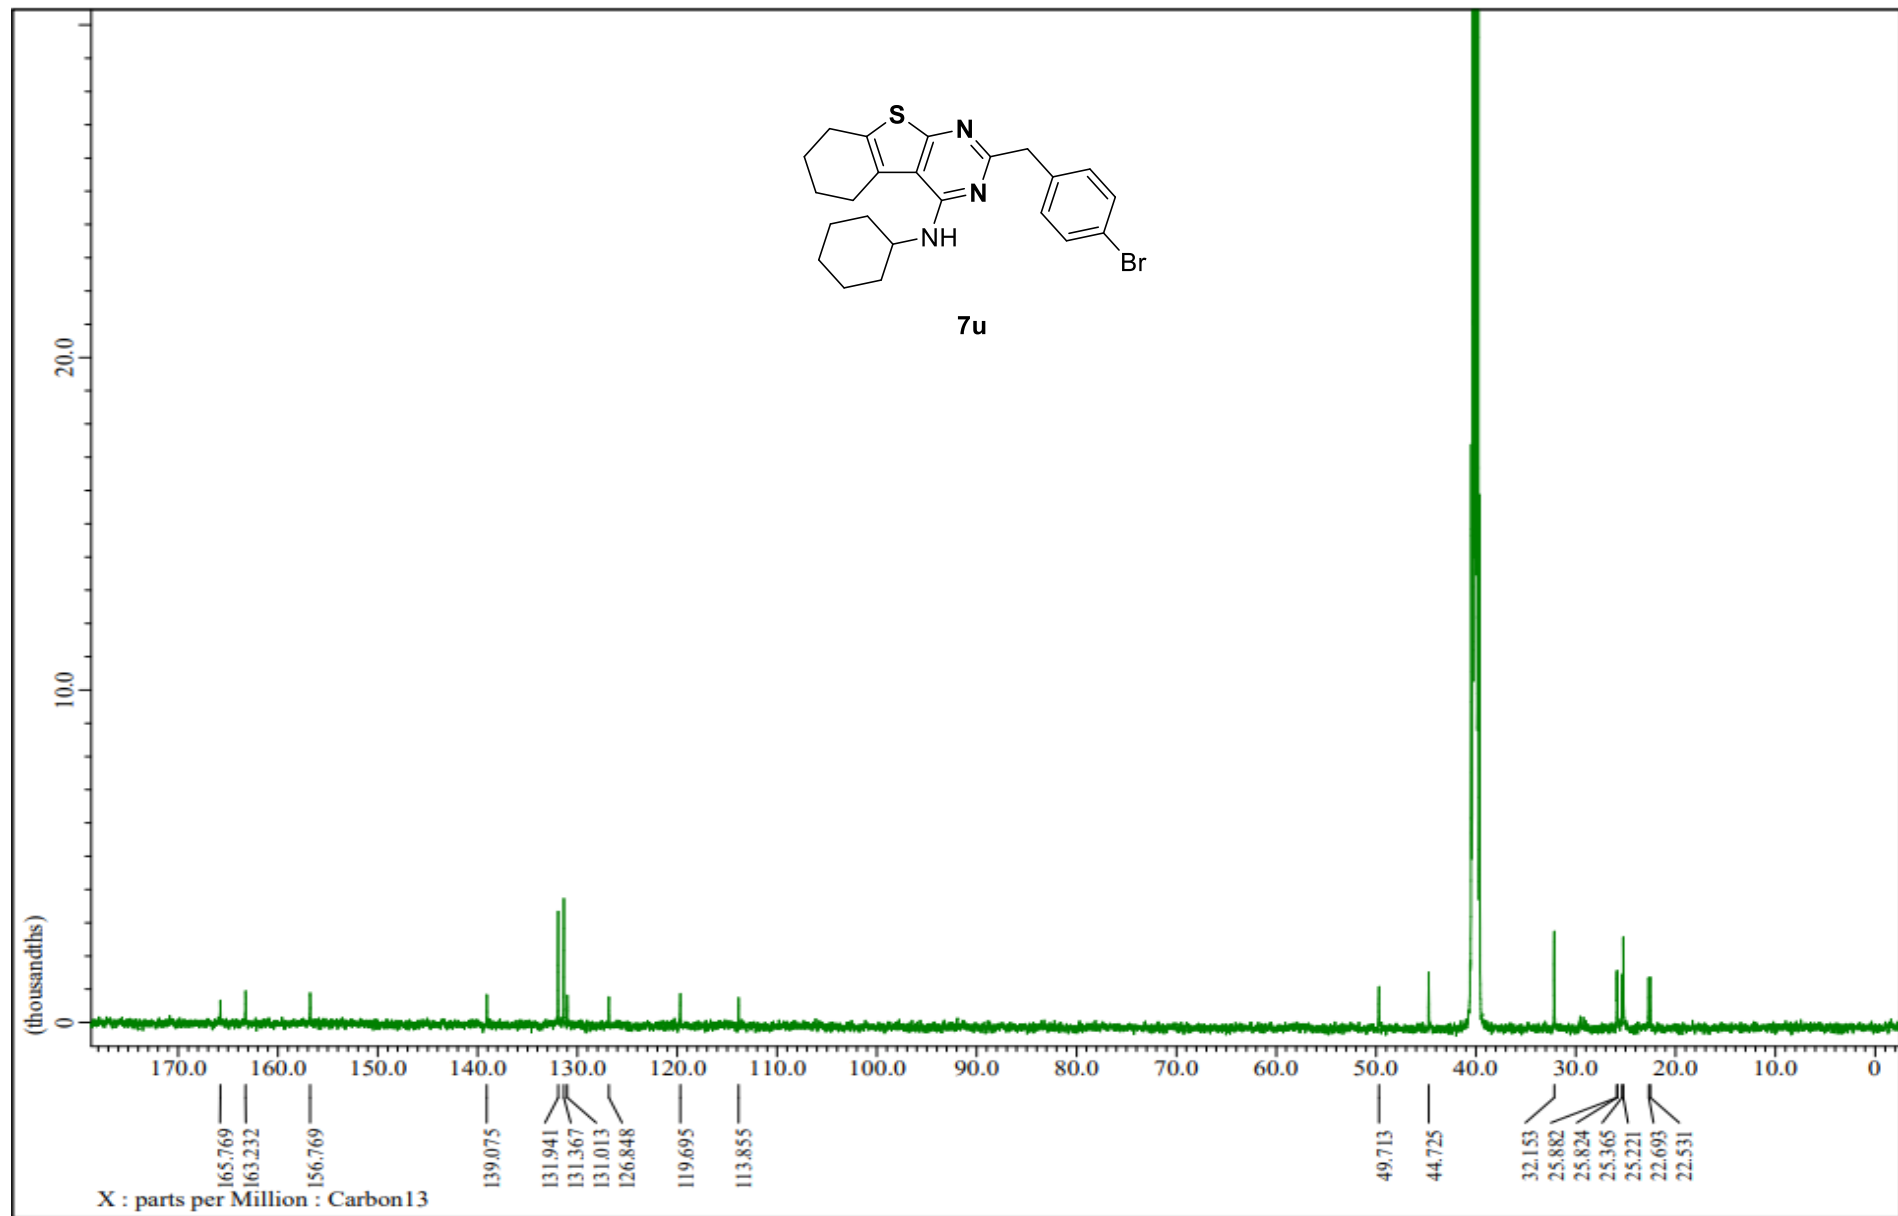

Figure S6  $^{13}\text{C}$  NMR (151 MHz,  $\text{CDCl}_3$ ) of 2-(4-bromobenzyl)-*N*-cyclohexyl-5,6,7,8-tetrahydrobenzo[4,5]thieno[2,3-*d*]pyrimidin-4-amine (**7u**)

## Spectrum Plot Report

| Name                 | Rack Pos.                                      | Instrument                  | Operator                        |
|----------------------|------------------------------------------------|-----------------------------|---------------------------------|
| Inj. Vol. (ul)       | Plate Pos. <td>IRM Status<td>Success</td></td> | IRM Status <td>Success</td> | Success                         |
| Data File            | Method (Acq)                                   | Comment                     | Acq. Time (Local)               |
| 29052024_AS-16_005.d |                                                |                             | 29-05-2024 17:59:50 (UTC+05:30) |

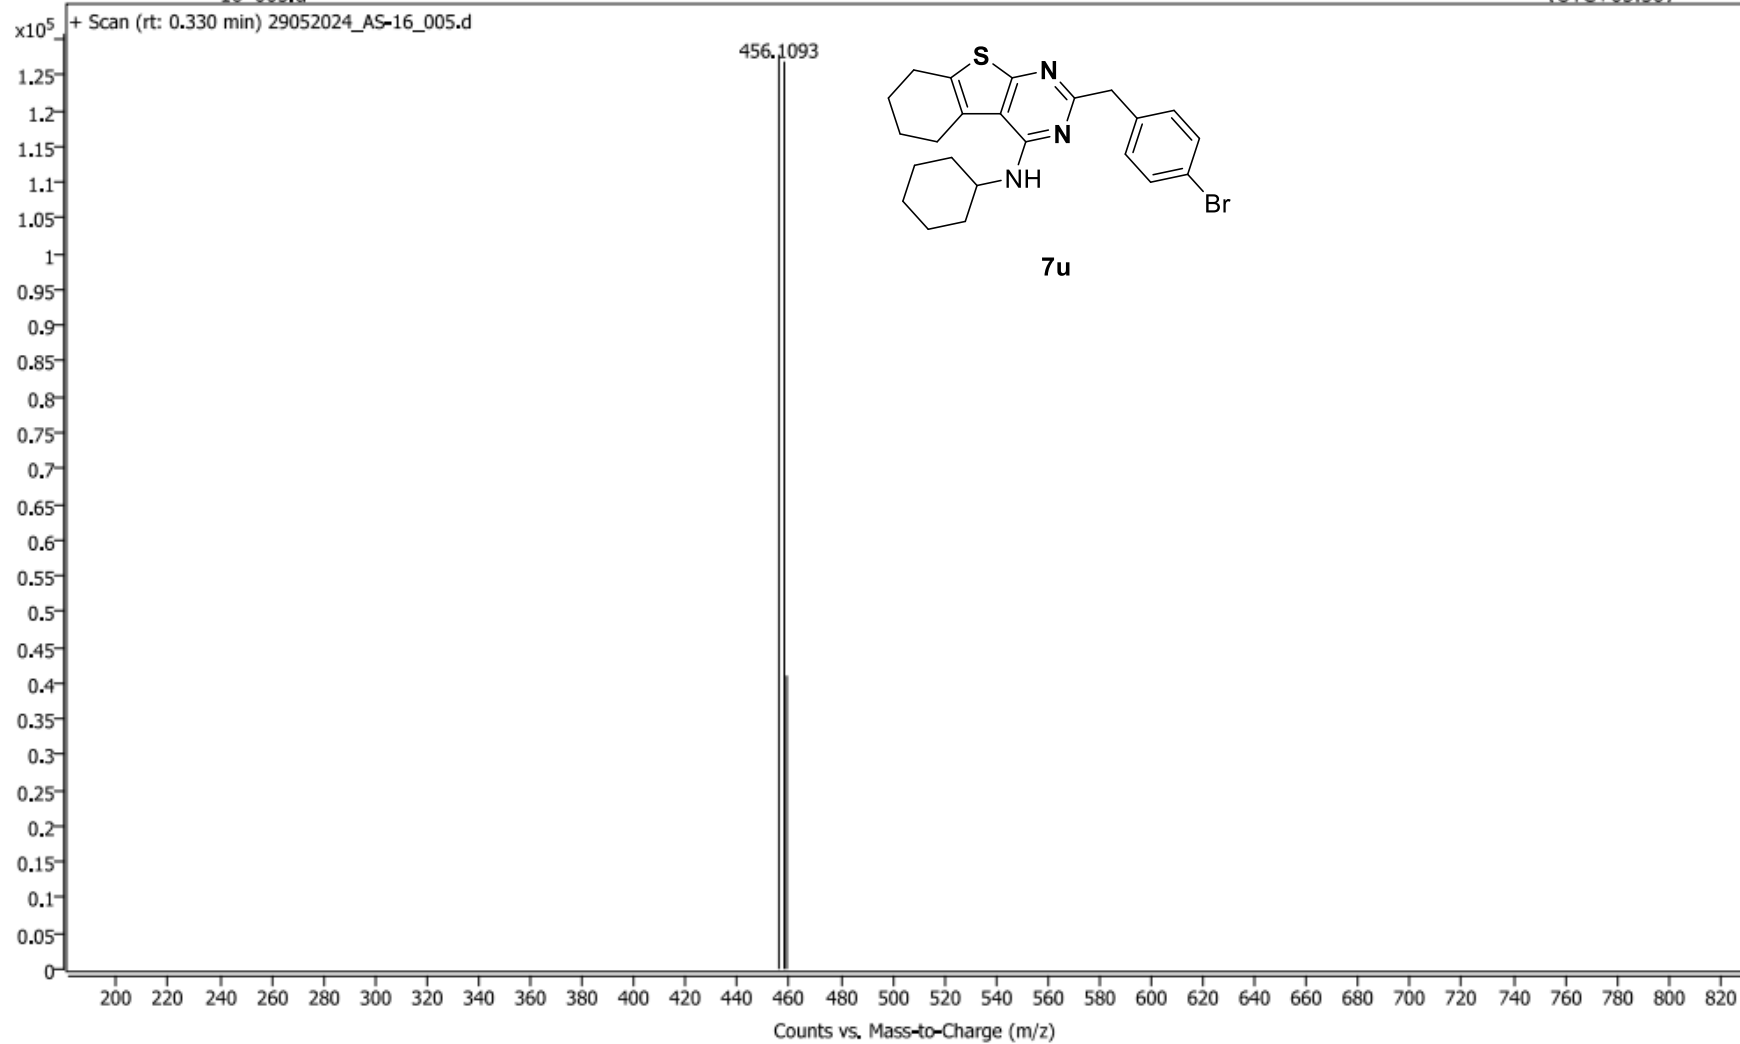

**Figure S7** HRMS (ESI-TOF) of 2-(4-bromobenzyl)-*N*-cyclohexyl-5,6,7,8-tetrahydrobenzo[4,5]thieno[2,3-*d*]pyrimidin-4-amine (**7u**)



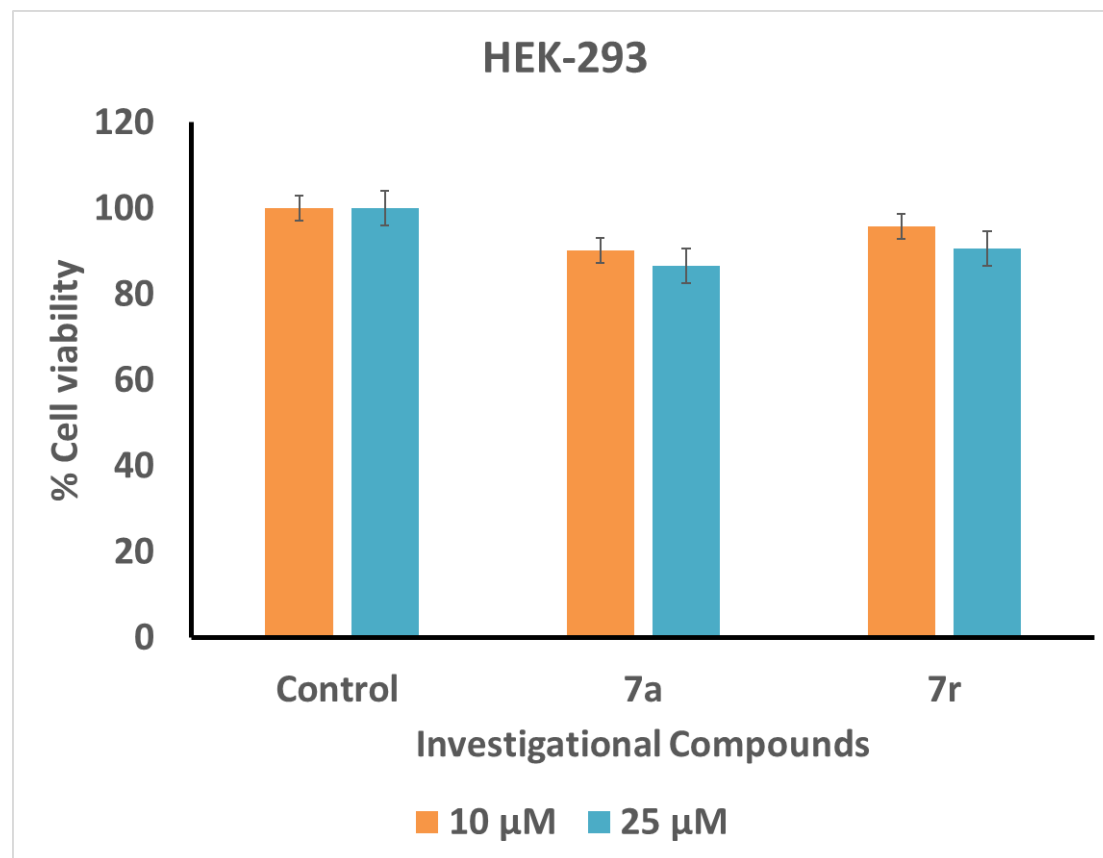

**Figure S8** Assessment of cytotoxicity of active compounds 7a and 7r against HEK-293 cells at 10 and 25 μM concentrations.
